# Supplementary material
Source: Royal Society of Chemistry journal article supplement (doi:10.1039/d6tc00748a)
Supplement: d6tc00748a1.pdf [file d6tc00748a1.pdf]

## Supplementary Information

### Trap-Controlled Operational Stability in Dibenzofuran-Based Hosts for Blue TADF OLEDs

Domantas Berenis,<sup>a</sup> Eigirdas Skuodis,<sup>a,b</sup> Kristupas Bagdonas,<sup>a</sup> Goda Grybauskaitė,<sup>a</sup> Dovydas Banevičius,<sup>a</sup> Gediminas Kreiza,<sup>a</sup> Rita Butkutė,<sup>a,b</sup> Juozas V. Gražulevičius<sup>b</sup> and Karolis Kazlauskas<sup>\*a</sup>

<sup>a</sup>*Institute of Photonics and Nanotechnology, Faculty of Physics, Vilnius University, Saulėtekio av. 3, LT-10257 Vilnius, Lithuania*

<sup>b</sup>*Department of Polymer Chemistry and Technology, Faculty of Chemical Technology, Kaunas University of Technology, Baršausko 59, LT-51423, Kaunas, Lithuania*

E-mail: [karolis.kazlauskas@ff.vu.lt](mailto:karolis.kazlauskas@ff.vu.lt)

### Synthesis and characterization

The target compounds were synthesized via a one-step Suzuki cross-coupling reaction from commercially available starting materials, affording the products in 63–71% yield. All the target compounds were obtained as white crystalline substances.

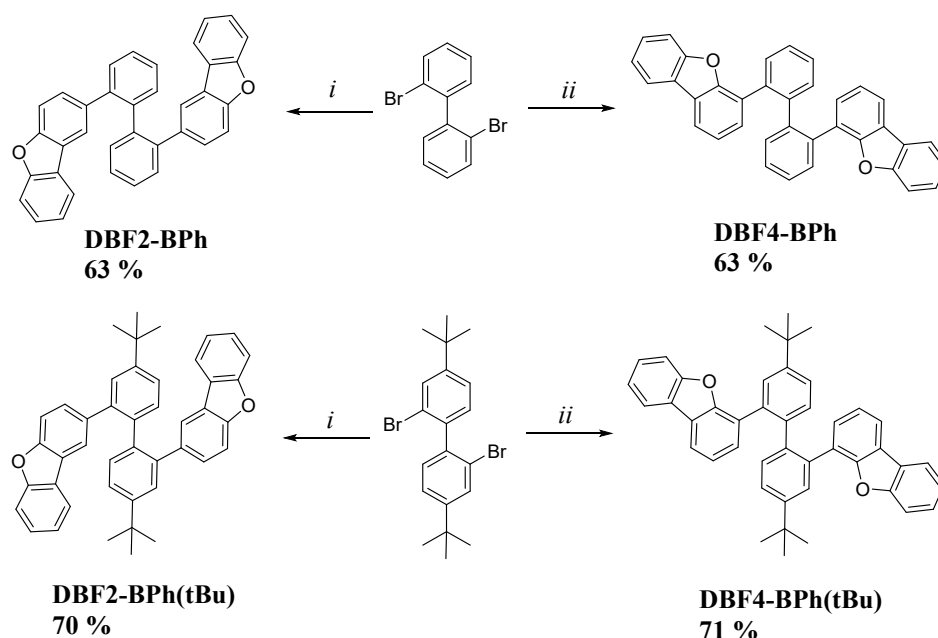

**Scheme S1.** Synthesis of the DBF–biphenyl hosts. *i*: dibenzo[b,d]furan-2-ylboronic acid, K<sub>2</sub>CO<sub>3</sub>, PdCl<sub>2</sub>(PPh<sub>3</sub>)<sub>2</sub>, dioxane:water (v/v 10:1), Ar, b. p. 24 h; *ii*: dibenzo[b,d]furan-4-ylboronic acid, K<sub>2</sub>CO<sub>3</sub>, PdCl<sub>2</sub>(PPh<sub>3</sub>)<sub>2</sub>, dioxane:water (v/v 10:1), Ar, b. p. 24 h.

General procedure (GP) of synthesis for compounds **DBF2-BPh**, **DBF4-BPh**, **DBF2-BPh(tBu)** and **DBF4-BPh(tBu)**:

Solution of corresponding dibromobiphenyl (1 eq.), corresponding dibenzofuranylboronic acid (2.6 eq.),  $K_2CO_3$  (4 eq.) in freshly distilled dioxane and water mixture (v/v 10:1) was thoroughly degassed using a vacuum pump and argon gas. Then a catalytic amount (1 mol%) of  $PdCl_2(PPh_3)_2$  was added, and the reaction mixture was stirred overnight at the boiling point under an argon atmosphere. After the completion of the reaction, an aqueous solution of NaCl was added, and the product was extracted with ethyl acetate (3 × 100 ml). Organic layers were combined, dried over sodium sulphate, and volatiles were removed under reduced pressure. The crude target compounds were purified by the methods described below.

2,2'-Bis(dibenzo[b,d]furan-2-yl)-1,1'-biphenyl (**DBF2-BPh**) was synthesized according to GP. The dibenzo[b,d]furan-2-ylboronic acid (1.76 g, 8.32 mmol), 2,2'-dibromo-1,1'-biphenyl (1 g, 3.2 mmol),  $K_2CO_3$  (1.76 g, 12.75 mmol),  $PdCl_2(PPh_3)_2$  (1 mol%), 33 ml of dioxane:water (v/v 10:1) were used. The product was purified by recrystallization from a mixture of THF and methanol, yielding the target compound as white crystals (0.98 g, 63%).  $^1H$  NMR (400 MHz, THF- $d_8$ )  $\delta$ : 7.56 (d,  $J = 7.2$  Hz, 2H), 7.50 – 7.39 (m, 4H), 7.38 – 7.26 (m, 6H), 7.16 (d,  $J = 7.6$  Hz, 2H), 7.11 – 7.00 (m, 4H), 6.95 (d,  $J = 1.8$  Hz, 2H), 6.65 (dd,  $J = 8.5, 1.9$  Hz, 2H).  $^{13}C$  NMR (101 MHz, THF- $d_8$ )  $\delta$ : 157.3, 155.8, 141.9, 141.4, 137.0, 132.5, 131.0, 129.5, 128.4, 128.0, 127.6, 125.0, 124.7, 123.5, 122.0, 120.9, 112.0, 110.8. Elemental analysis. Calcd for  $C_{36}H_{22}O_2$  (%): C 88.87, H 4.56, O 6.58; found (%): C 88.85, H 4.58, O 6.57.

2,2'-Bis(dibenzo[b,d]furan-4-yl)-1,1'-biphenyl (**DBF4-BPh**) was synthesized according to GP. The dibenzo[b,d]furan-4-ylboronic acid (1.76 g, 8.32 mmol), 2,2'-dibromo-1,1'-biphenyl (1 g, 3.2 mmol),  $K_2CO_3$  (1.76 g, 12.75 mmol),  $PdCl_2(PPh_3)_2$  (1 mol%), 33 ml of dioxane:water (v/v 10:1) were used. The product was purified by recrystallization from a mixture of THF and methanol, yielding the target compound as white crystals (0.99 g, 63%).  $^1H$  NMR (400 MHz,  $CDCl_3$ )  $\delta$ : 7.56 (d,  $J = 7.6$  Hz, 2H), 7.38 – 7.30 (m, 2H), 7.29 – 7.17 (m, 10H), 7.17 – 7.10 (m, 2H), 7.00 (t,  $J = 7.4$  Hz, 2H), 6.71 (t,  $J = 7.6$  Hz, 2H), 6.55 (d,  $J = 7.5$  Hz, 2H).  $^{13}C$  NMR (101 MHz,  $CDCl_3$ )  $\delta$ : 161.0, 158.6, 146.2, 140.9, 137.3, 136.2, 134.4, 133.1, 132.7, 131.8, 130.3, 129.3, 129.1, 127.5, 127.1, 125.5, 124.1, 116.5. Elemental analysis. Calcd for  $C_{36}H_{22}O_2$  (%): C 88.87, H 4.56, O 6.58; found (%): C 88.89, H 4.57, O 6.59.

2,2'-(4,4'-Di-*tert*-butyl-[1,1'-biphenyl]-2,2'-diyl)dibenzofuran (**DBF2-BPh(tBu)**) was synthesized according to GP. The dibenzo[b,d]furan-2-ylboronic acid (1.30 g, 6.1 mmol), 2,2'-dibromo-4,4'-di-*tert*-butyl-1,1'-biphenyl (1 g, 2.4 mmol),  $K_2CO_3$  (1.3 g, 9.42 mmol),  $PdCl_2(PPh_3)_2$  (1 mol%), 22 ml of dioxane:water (v/v 10:1) were used. The crude product was purified by flash chromatography on silica gel using hexane as the eluent and recrystallized from methanol, yielding the target compound as white crystals (0.98 g, 70%).  $^1H$  NMR (400 MHz, THF- $d_8$ )  $\delta$ : 7.51 – 7.43 (m, 6H), 7.38 – 7.27 (m, 4H), 7.19 (s, 2H), 7.10 – 7.00 (m, 4H), 6.93 (s, 2H), 6.66 (d,  $J = 8.5$  Hz, 2H), 1.34 (s, 18H).  $^{13}C$  NMR (101 MHz, THF- $d_8$ )  $\delta$ : 157.4, 155.9, 151.3, 141.6, 138.8, 137.8, 132.4, 129.8, 128.0, 127.7, 125.2, 125.2, 124.7, 123.5, 122.1, 121.1, 112.1, 110.8, 35.4, 31.9. Elemental analysis. Calcd for  $C_{44}H_{38}O_2$  (%): C 88.26, H 6.40, O 5.36; found (%): C 88.23, H 6.38, O 5.38.

4,4'-(4,4'-Di-*tert*-butyl-[1,1'-biphenyl]-2,2'-diyl)dibenzo[b,d]furan (**DBF4-BPh(tBu)**) was synthesized according to GP. The dibenzo[b,d]furan-4-ylboronic acid (1.30 g, 6.1 mmol), 2,2'-dibromo-4,4'-di-*tert*-butyl-1,1'-biphenyl (1 g, 2.4 mmol), K<sub>2</sub>CO<sub>3</sub> (1.3 g, 9.42 mmol), PdCl<sub>2</sub>(PPh<sub>3</sub>)<sub>2</sub> (1 mol%), 22 ml of dioxane:water (v/v 10:1) were used. The crude product was purified by flash chromatography on silica gel using hexane as the eluent and recrystallized from methanol, yielding the target compound as white crystals (1 g, 71%). <sup>1</sup>H NMR (400 MHz, THF-*d*<sub>8</sub>) δ: 7.63 (d, *J* = 7.6 Hz, 2H), 7.51 – 7.44 (m, 2H), 7.44 – 7.29 (m, 8H), 7.24 (d, *J* = 8.1 Hz, 2H), 7.17 (t, *J* = 7.4 Hz, 2H), 6.76 (t, *J* = 7.6 Hz, 2H), 6.71 – 6.65 (m, 2H), 1.25 (s, 18H). <sup>13</sup>C NMR (101 MHz, THF-*d*<sub>8</sub>) δ: 156.8, 154.2, 150.2, 139.2, 136.0, 132.4, 129.6, 128.6, 127.3, 126.9, 125.14, 125.10, 124.8, 122.9, 122.6, 121.0, 119.3, 112.0, 67.5, 35.1, 31.7, 25.4. Elemental analysis. Calcd for C<sub>44</sub>H<sub>38</sub>O<sub>2</sub> (%): C 88.26, H 6.40, O 5.36; found (%): C 88.24, H 6.41, O 5.35.

## BDE calculations

Table S1. Calculated bond dissociation energies (BDE) of DBF–biphenyl hosts (refer to Figure S1).

| Bond                 | B1 BDE (eV) |          |         | B2 BDE (eV) |          |         | B3 BDE (eV) |          |         |
|----------------------|-------------|----------|---------|-------------|----------|---------|-------------|----------|---------|
|                      | Neutral     | Cationic | Anionic | Neutral     | Cationic | Anionic | Neutral     | Cationic | Anionic |
| <b>DBF2-BPh</b>      | 4.61        | 3.57     | 5.44    | 4.82        | 3.89     | 2.42    | -           | -        | -       |
| <b>DBF4-BPh</b>      | 4.56        | 3.61     | 5.43    | 4.87        | 3.14     | 2.38    | -           | -        | -       |
| <b>DBF2-BPh(tBu)</b> | 4.66        | 3.57     | 5.48    | 4.81        | 3.87     | 2.44    | 3.93        | 2.86     | 4.01    |
| <b>DBF4-BPh(tBu)</b> | 4.61        | 3.63     | 5.47    | 4.86        | 3.16     | 2.40    | 3.93        | 3.02     | 4.02    |

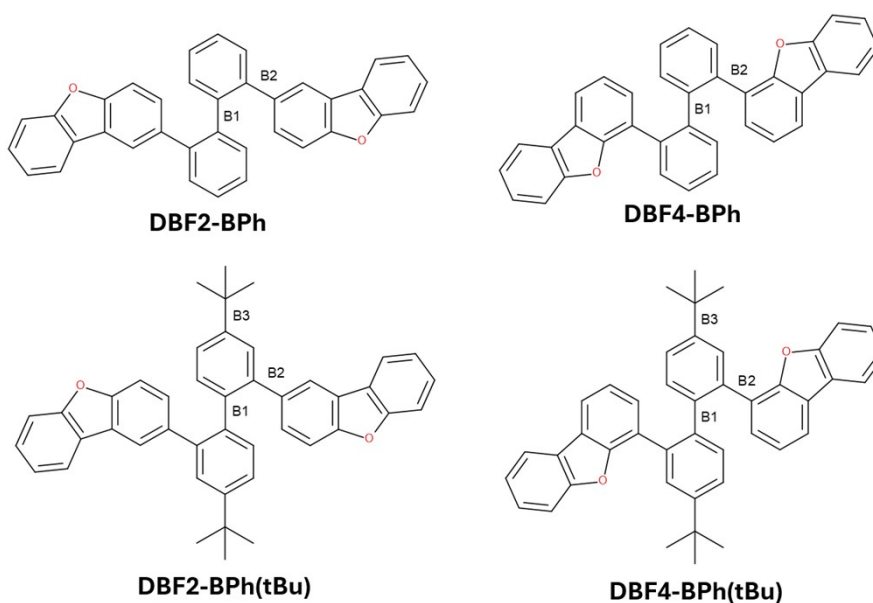

Figure S1. DBF–biphenyl host molecule structures with marked bonds for BDE calculation.

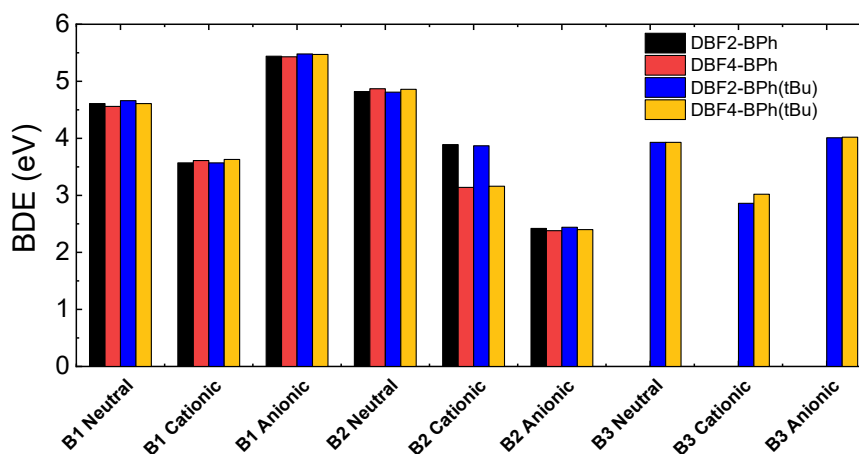

Figure S2. Bar chart of BDEs for DBF–biphenyl hosts in the neutral, cationic, and anionic states (values taken from Table S1).

## Thermal characterization

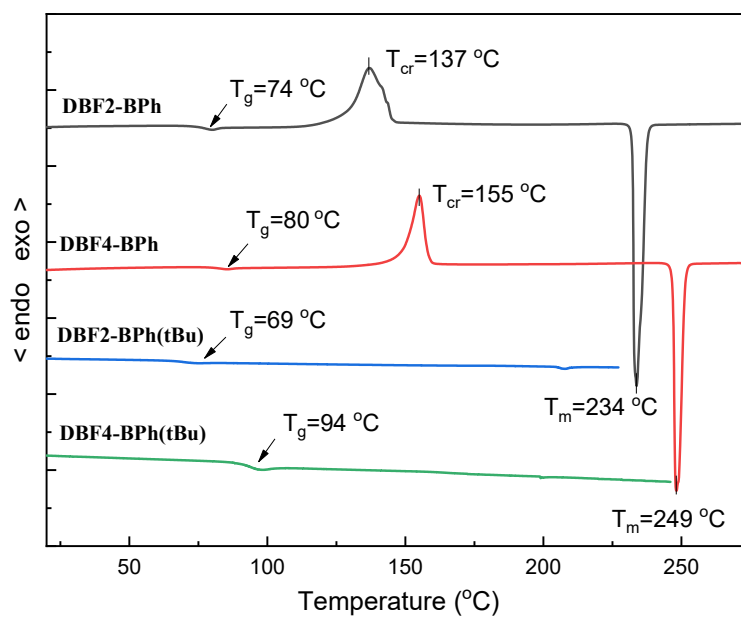

Figure S3. DSC 2<sup>nd</sup> heating scans of the DBF–biphenyl hosts recorded under nitrogen atmosphere at a heating rate of 10 °C/min. Glass-transition ( $T_g$ ), crystallization ( $T_{cr}$ ), and melting ( $T_m$ ) temperatures, indicated.

Table S2. Thermal properties of the DBF–biphenyl hosts.

| Host                 | $T_{-5\%}$ <sup>a</sup> , °C | $T_g$ <sup>b*</sup> , °C | $T_{cr}$ <sup>b*</sup> , °C | $T_m$ <sup>b</sup> , °C |
|----------------------|------------------------------|--------------------------|-----------------------------|-------------------------|
| <b>DBF2-BPh</b>      | 312                          | 74                       | 137                         | 234                     |
| <b>DBF4-BPh</b>      | 318                          | 80                       | 155                         | 249                     |
| <b>DBF2-BPh(tBu)</b> | 293                          | 69                       | -                           | 190                     |
| <b>DBF4-BPh(tBu)</b> | 309                          | 94                       | -                           | 175                     |

<sup>a</sup> Measured by TGA under nitrogen atmosphere at a heating rate of 20 °C/min.

<sup>b</sup> Measured by DSC under nitrogen atmosphere at a heating rate of 10 °C/min.

\*Determined from DSC 2<sup>nd</sup> heating curves.

### Electrochemistry and additional device data

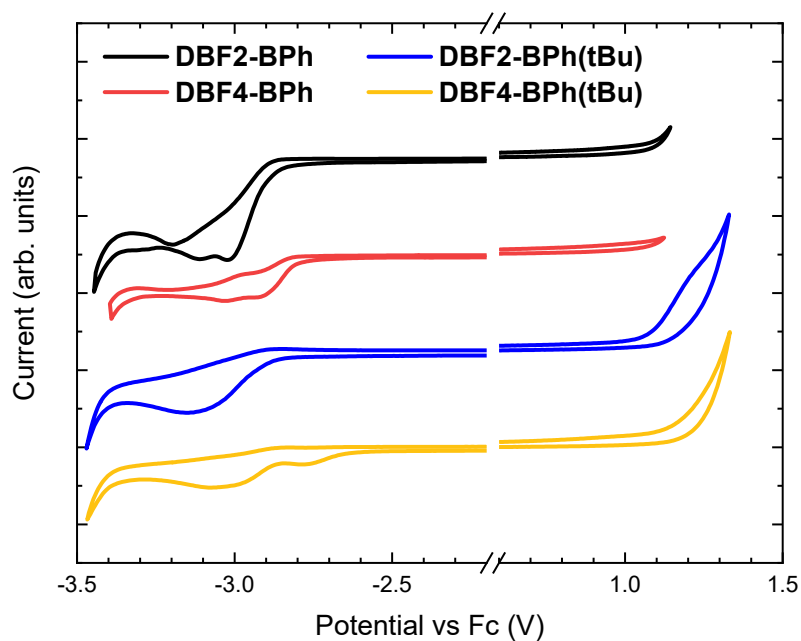

Figure S4. Cyclic voltammograms of the DBF-biphenyl hosts.

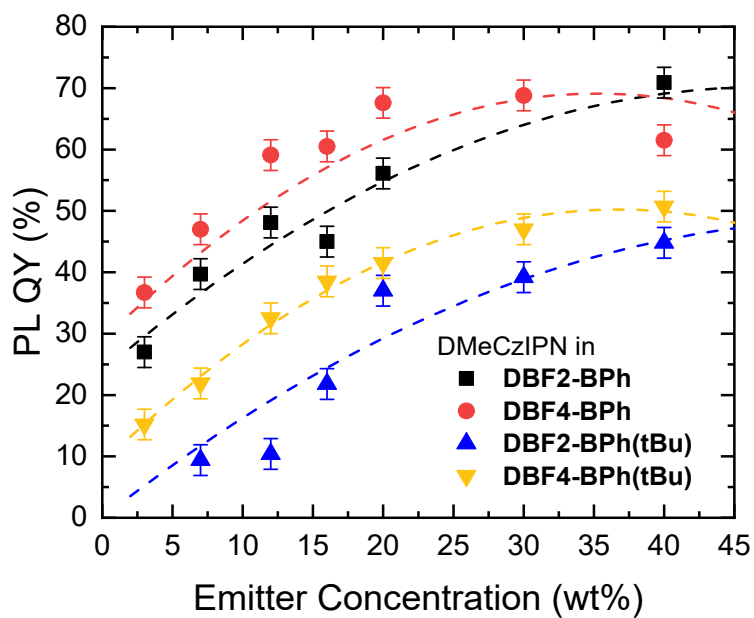

Figure S5. PL QY of DMeCzIPN-doped host films as a function of emitter concentration.

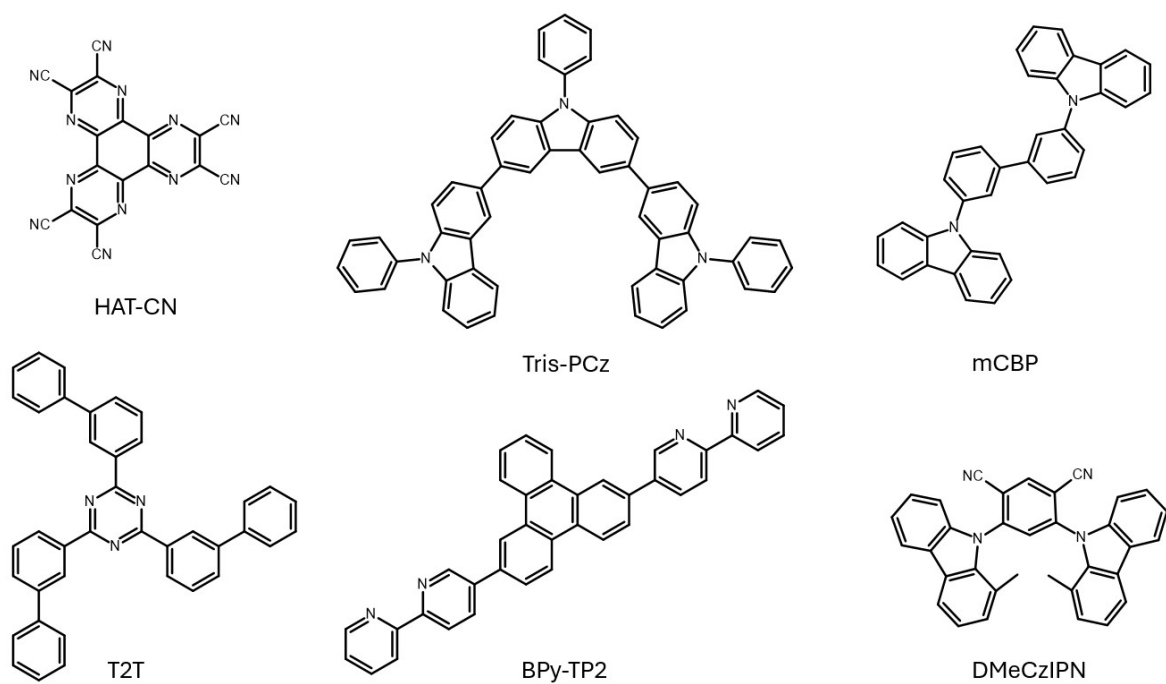

Figure S6. Chemical structures of HAT-CN, Tris-PCz, mCBP, T2T, BPy-TP2 and DMeCzIPN used in OLED fabrication.

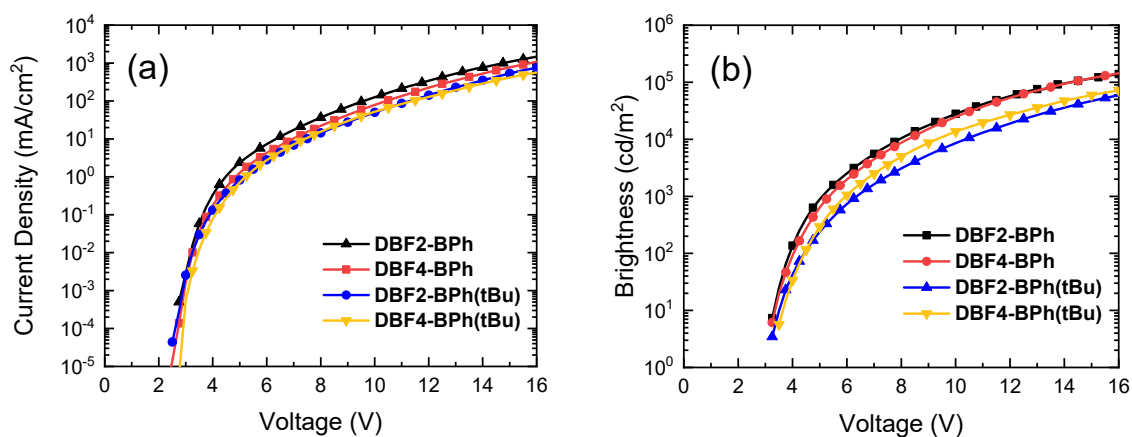

Figure S7. Device performance of blue TADF-OLEDs based on the DBF-biphenyl hosts: (a) current density vs voltage, (b) brightness vs voltage.

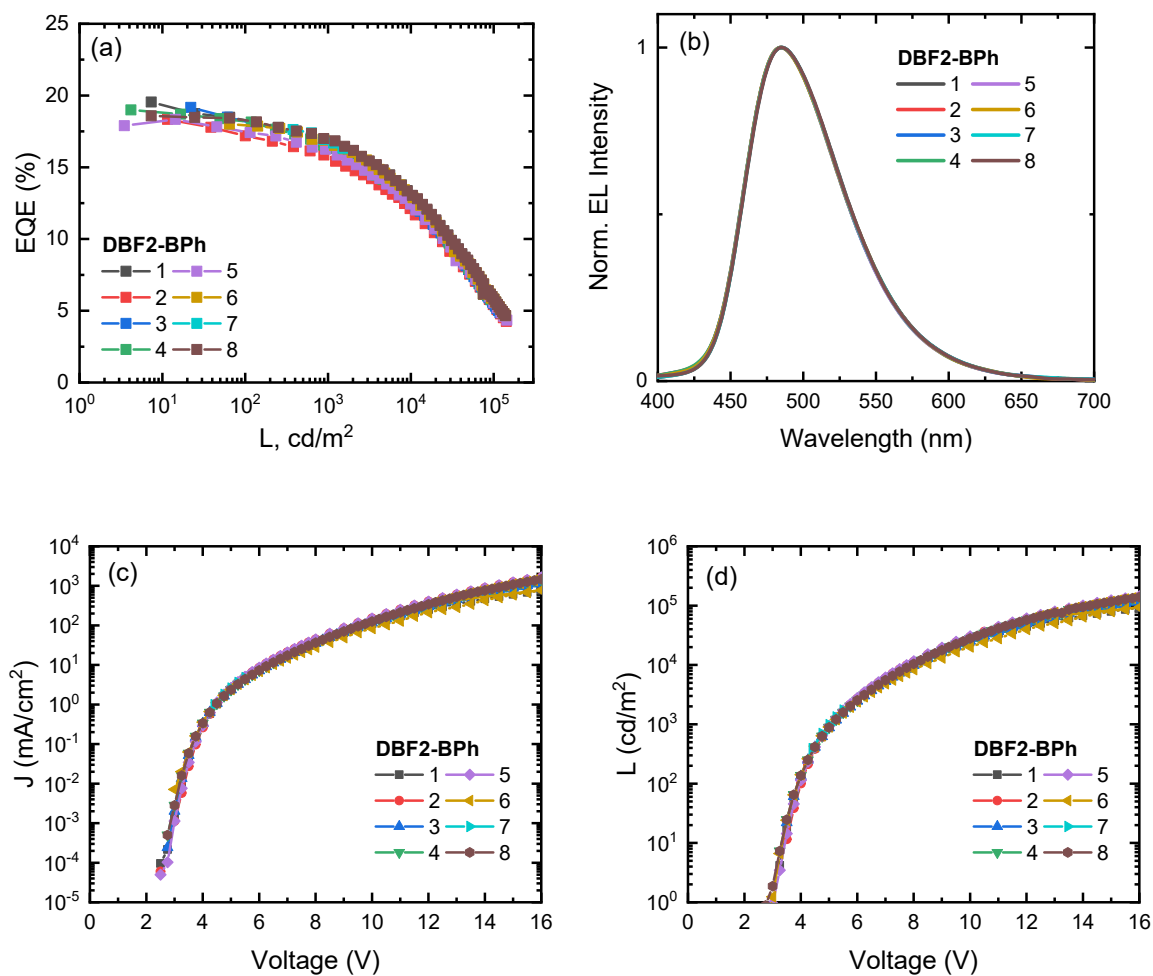

Figure S8. Device-to-device reproducibility for blue TADF OLEDs based on **DBF2-BPh** host, measured for several independently fabricated pixels (1–8): (a) EQE vs luminance, (b) EL spectra at 10 mA cm<sup>-2</sup>, (c) current density vs voltage, (d) brightness vs voltage curves.

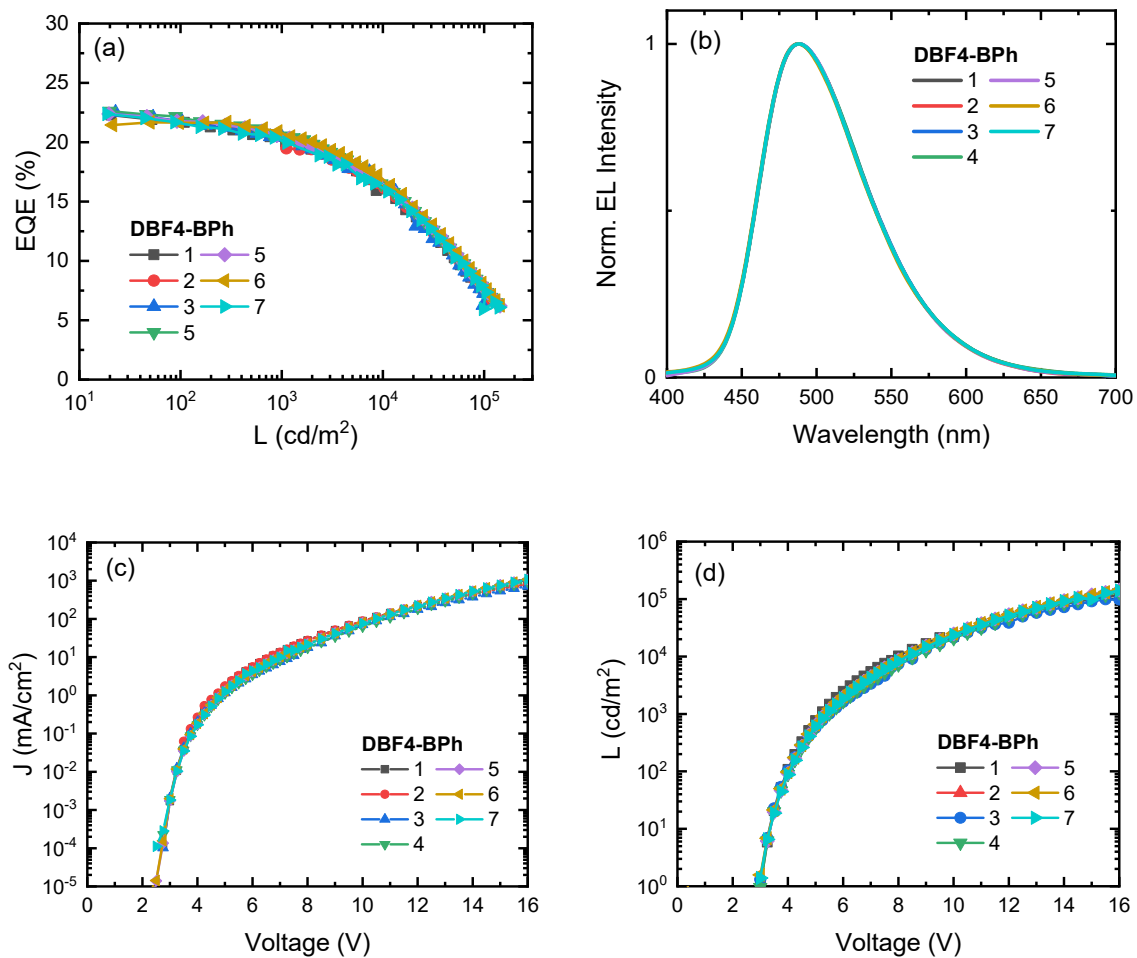

Figure S9. Device-to-device reproducibility for blue TADF OLEDs based on **DBF4-BPh** host, measured for several independently fabricated pixels (1–7): (a) EQE vs luminance, (b) EL spectra at 10 mA cm<sup>-2</sup>, (c) current density vs voltage, (d) brightness vs voltage curves.

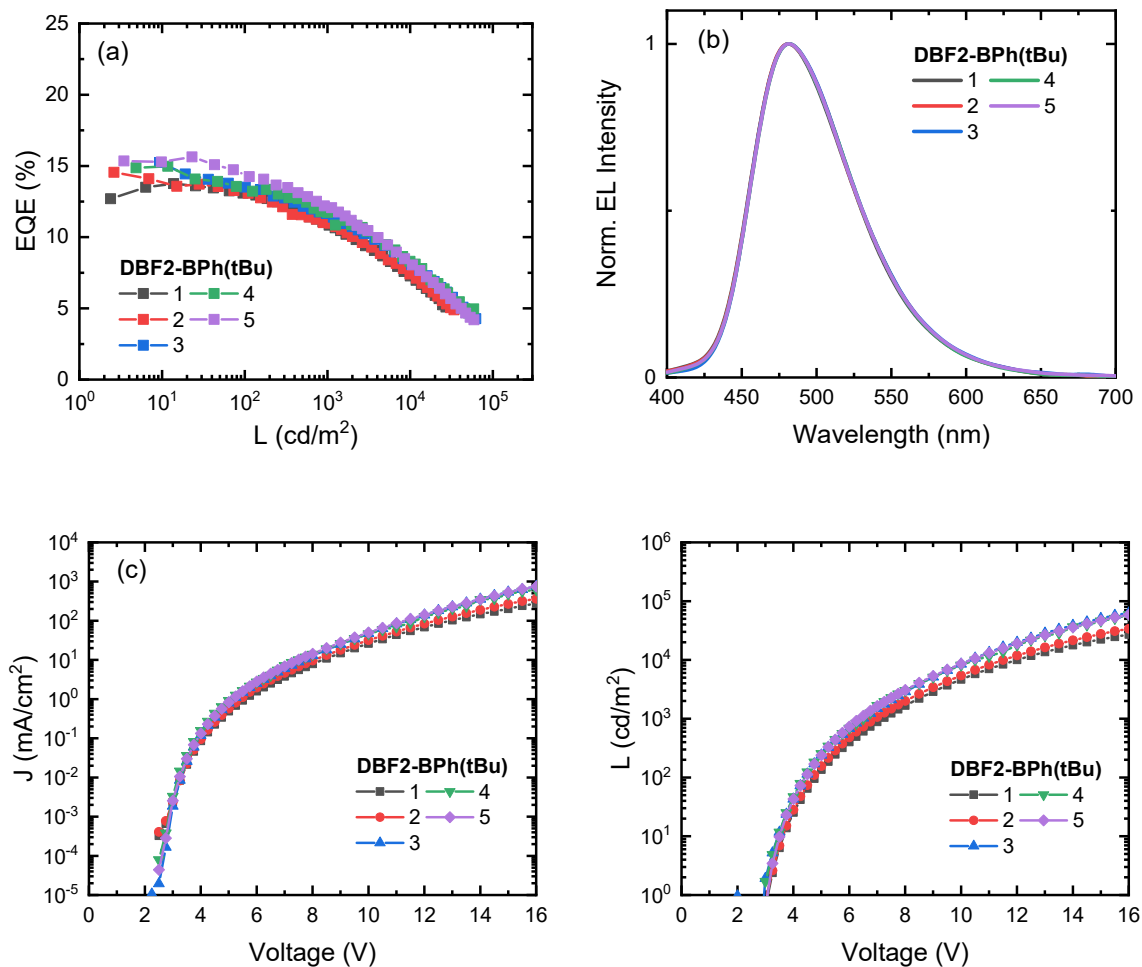

Figure S10. Device-to-device reproducibility for blue TADF OLEDs based on **DBF2-BPh(tBu)** host, measured for several independently fabricated pixels (1–5): (a) EQE vs luminance, (b) EL spectra at 10 mA cm<sup>-2</sup>, (c) current density vs voltage, (d) brightness vs voltage curves.

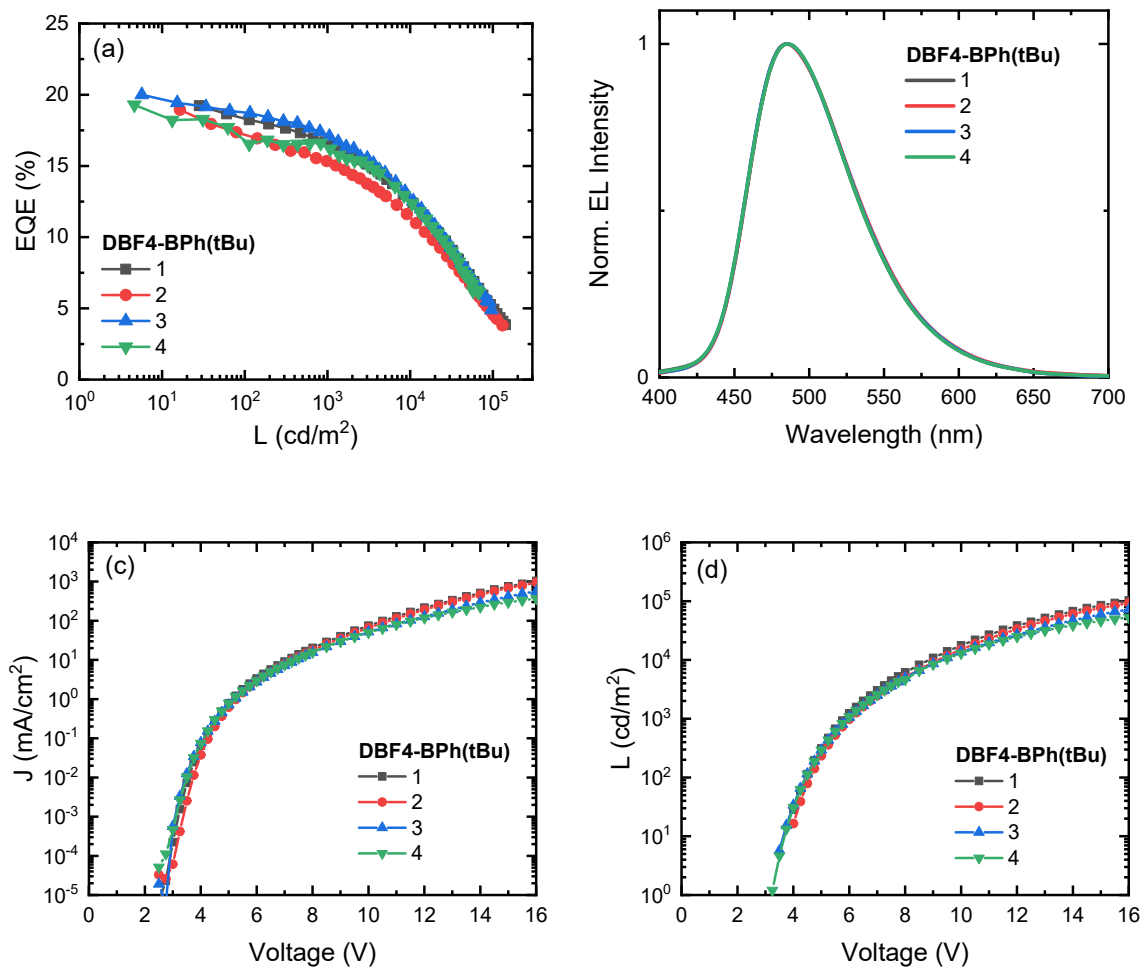

Figure S11. Device-to-device reproducibility for blue TADF OLEDs based on **DBF4-BPh(tBu)** host, measured for several independently fabricated pixels (1–4): (a) EQE vs luminance, (b) EL spectra at 10 mA cm<sup>-2</sup>, (c) current density vs voltage, (d) brightness vs voltage curves.

## Impedance fitting results

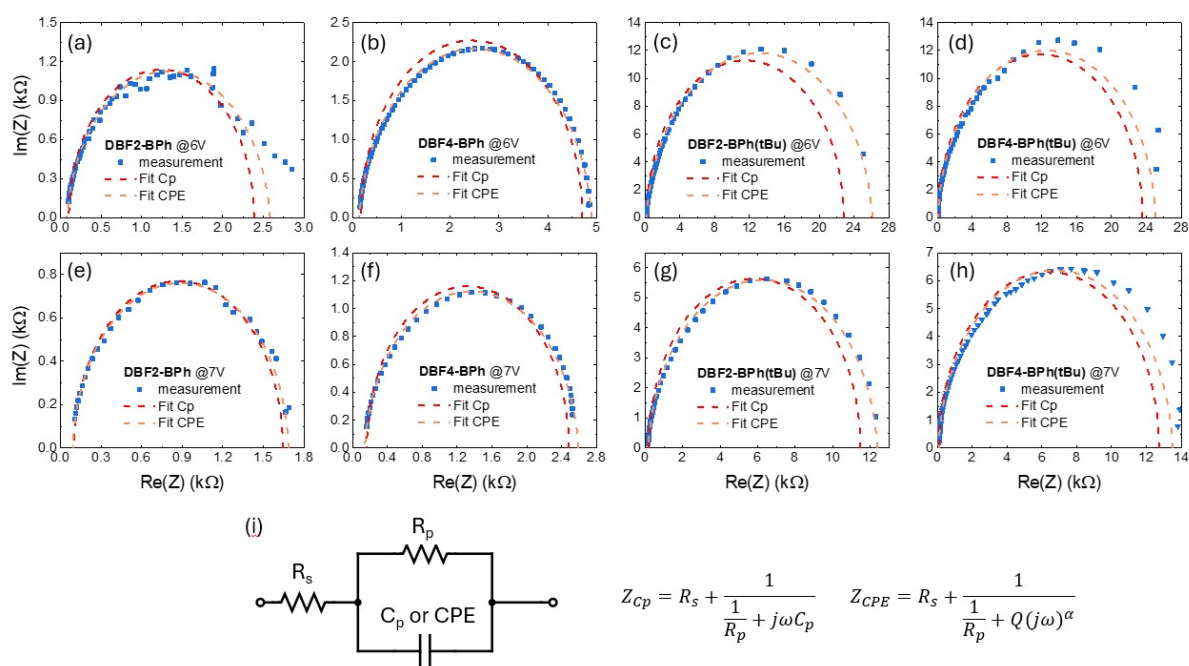

Figure S12. Nyquist plots of DMeCzIPN-based OLEDs using **DBF2-BPh** (a, e), **DBF4-BPh** (b, f), **DBF2-BPh(tBu)** (c, g), and **DBF4-BPh(tBu)** (d, h) as hosts measured at DC biases of 6 V (a-d) and 7 V (e-h), with equivalent-circuit fits using  $Z(\omega)=R_s+(R_p\parallel C_p)$  and  $Z(\omega)=R_s+(R_p\parallel CPE)$ . The equivalent circuit schematics and corresponding impedance expressions are shown in (i).

Table S3. Equivalent-circuit fitting parameters obtained using the  $R_s+(R_p\parallel CPE)$  model for impedance spectra of DMeCzIPN-based OLEDs with the DBF-biphenyl hosts at typical operating biases.

| Bias voltage, V | Host                 | $R_s, \Omega$ | $R_p, \Omega$ | $Q, F \cdot s^{\alpha-1}$ | $\alpha$ |
|-----------------|----------------------|---------------|---------------|---------------------------|----------|
| 6               | <b>DBF2-BPh</b>      | 66.46         | 2733          | $5.47 \cdot 10^{-9}$      | 0.89     |
|                 | <b>DBF4-BPh</b>      | 133.8         | 4764          | $2.42 \cdot 10^{-9}$      | 0.94     |
|                 | <b>DBF2-BPh(tBu)</b> | 153.9         | 25950         | $2.17 \cdot 10^{-9}$      | 0.94     |
|                 | <b>DBF4-BPh(tBu)</b> | 67.44         | 24950         | $1.36 \cdot 10^{-9}$      | 0.98     |
| 7               | <b>DBF2-BPh</b>      | 91.22         | 1594          | $1.82 \cdot 10^{-9}$      | 0.97     |
|                 | <b>DBF4-BPh</b>      | 137.8         | 2455          | $2.28 \cdot 10^{-9}$      | 0.94     |
|                 | <b>DBF2-BPh(tBu)</b> | 156.5         | 12210         | $2.03 \cdot 10^{-9}$      | 0.95     |
|                 | <b>DBF4-BPh(tBu)</b> | 64.89         | 13750         | $1.58 \cdot 10^{-9}$      | 0.97     |

## Copies of $^1\text{H}$ NMR and $^{13}\text{C}$ NMR spectra

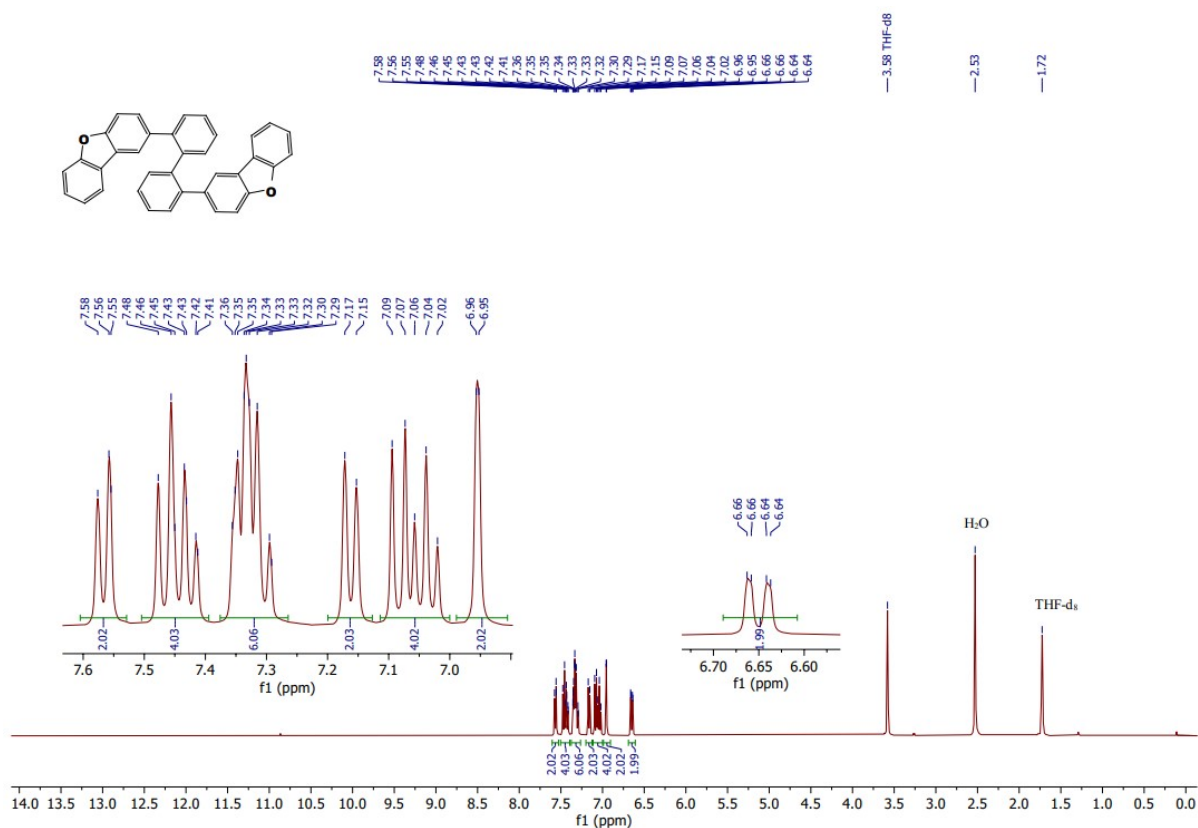

Fig. S13.  $^1\text{H}$  NMR spectra of 2,2'-bis(dibenzo[b,d]furan-2-yl)-1,1'-biphenyl (DBF2-BPh)

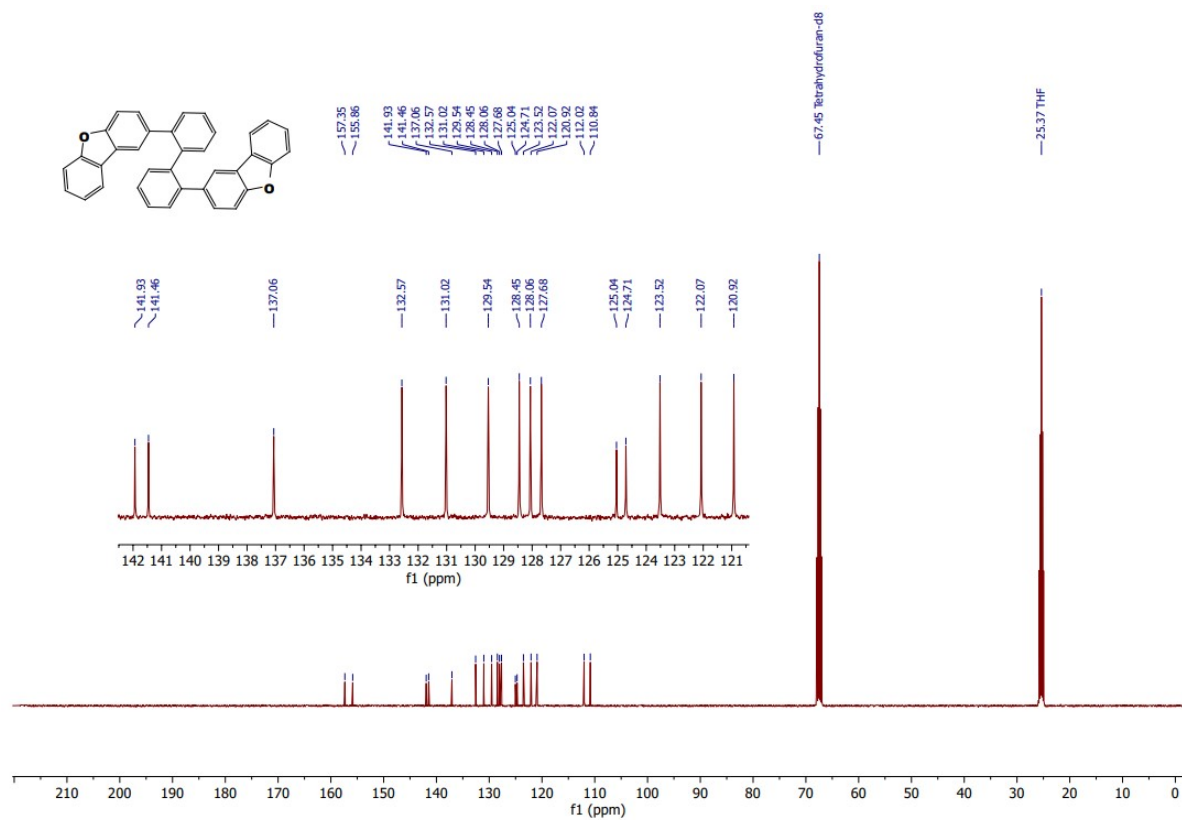

Fig. S14.  $^{13}\text{C}$  NMR spectra of 2,2'-bis(dibenzo[b,d]furan-2-yl)-1,1'-biphenyl (DBF2-BPh)

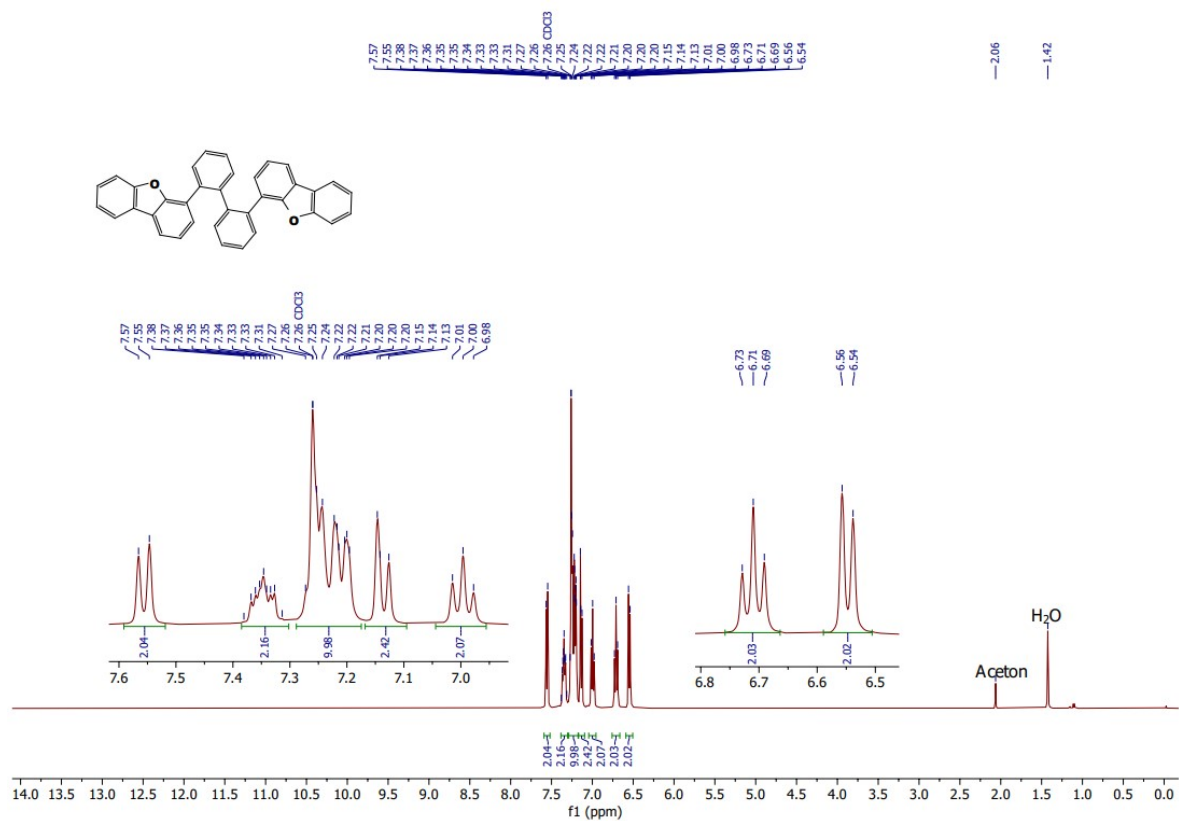

Fig. S15. <sup>1</sup>H NMR spectra of 2,2'-bis(dibenzo[b,d]furan-4-yl)-1,1'-biphenyl (DBF4-BPh)

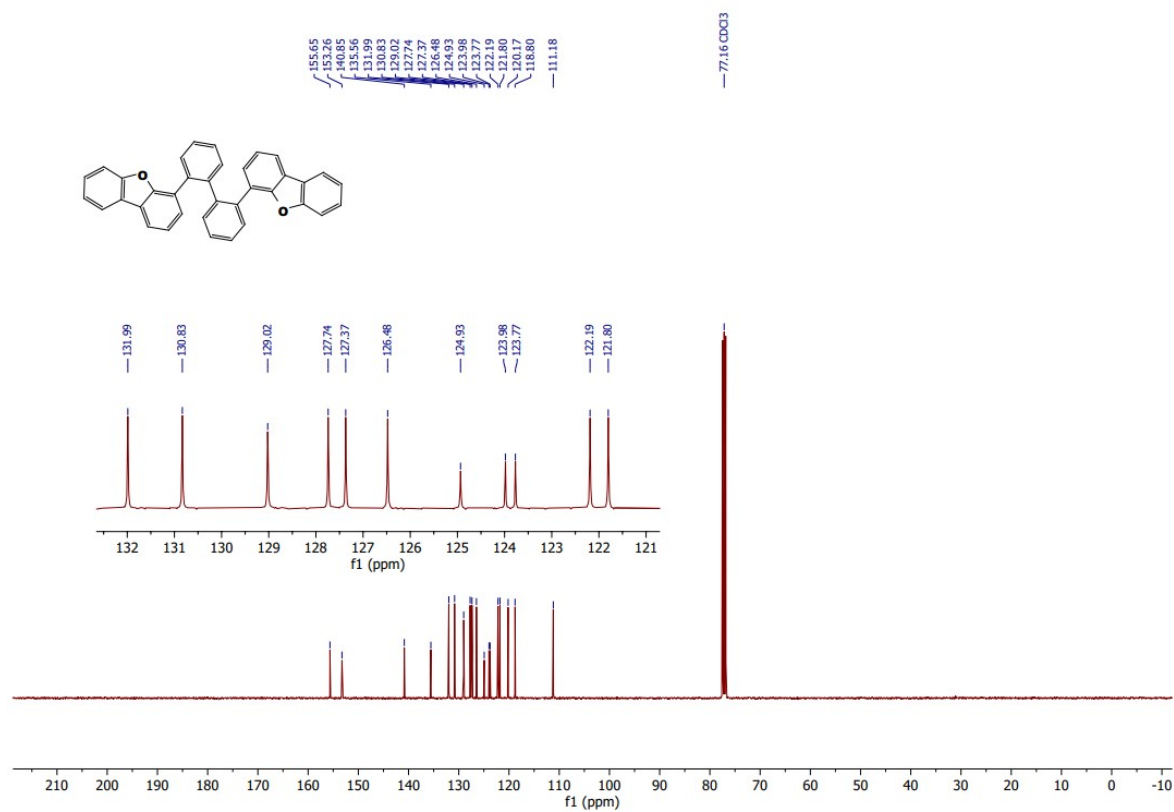

Fig. S16. <sup>13</sup>C NMR spectra of 2,2'-bis(dibenzo[b,d]furan-4-yl)-1,1'-biphenyl (DBF4-BPh)

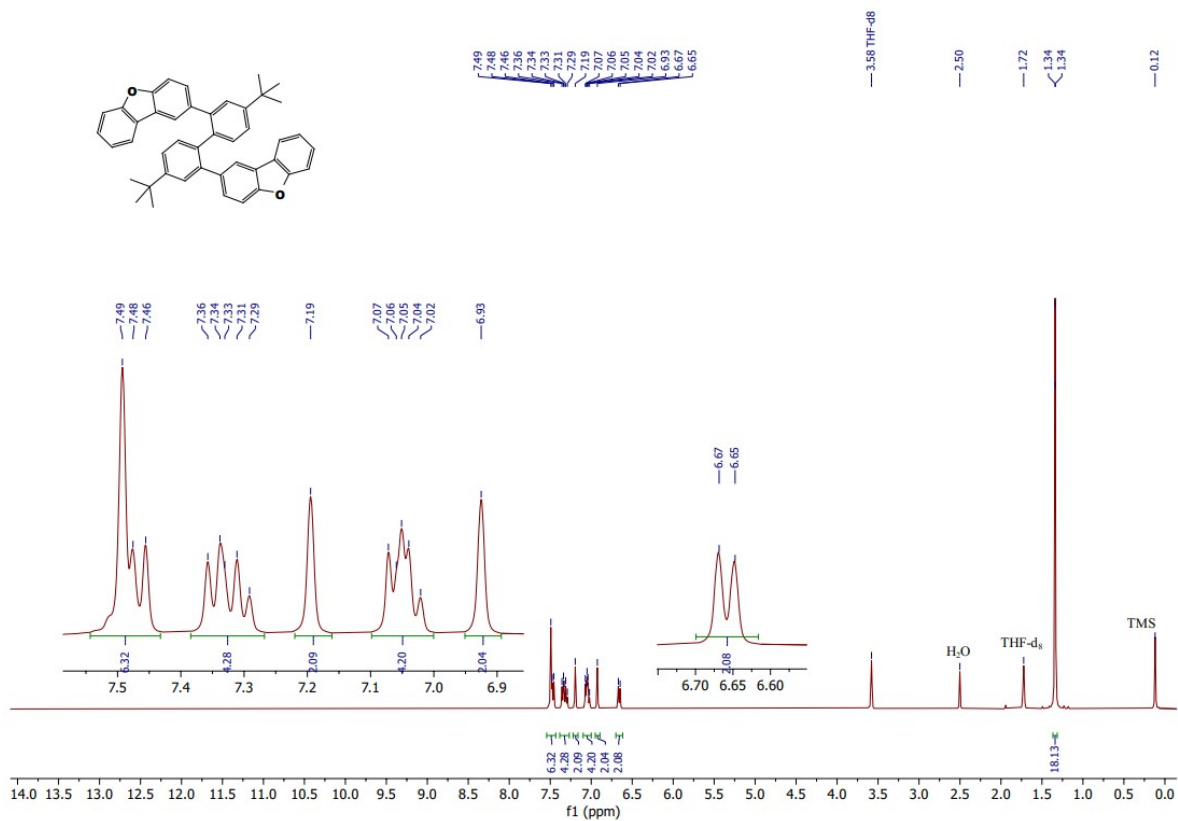

Fig. S17. <sup>1</sup>H NMR spectra of 2,2'-(4,4'-di-*tert*-butyl-[1,1'-biphenyl]-2,2'-diyl)didibenzo[b,d]furan (**DBF2-BPh(tBu)**)

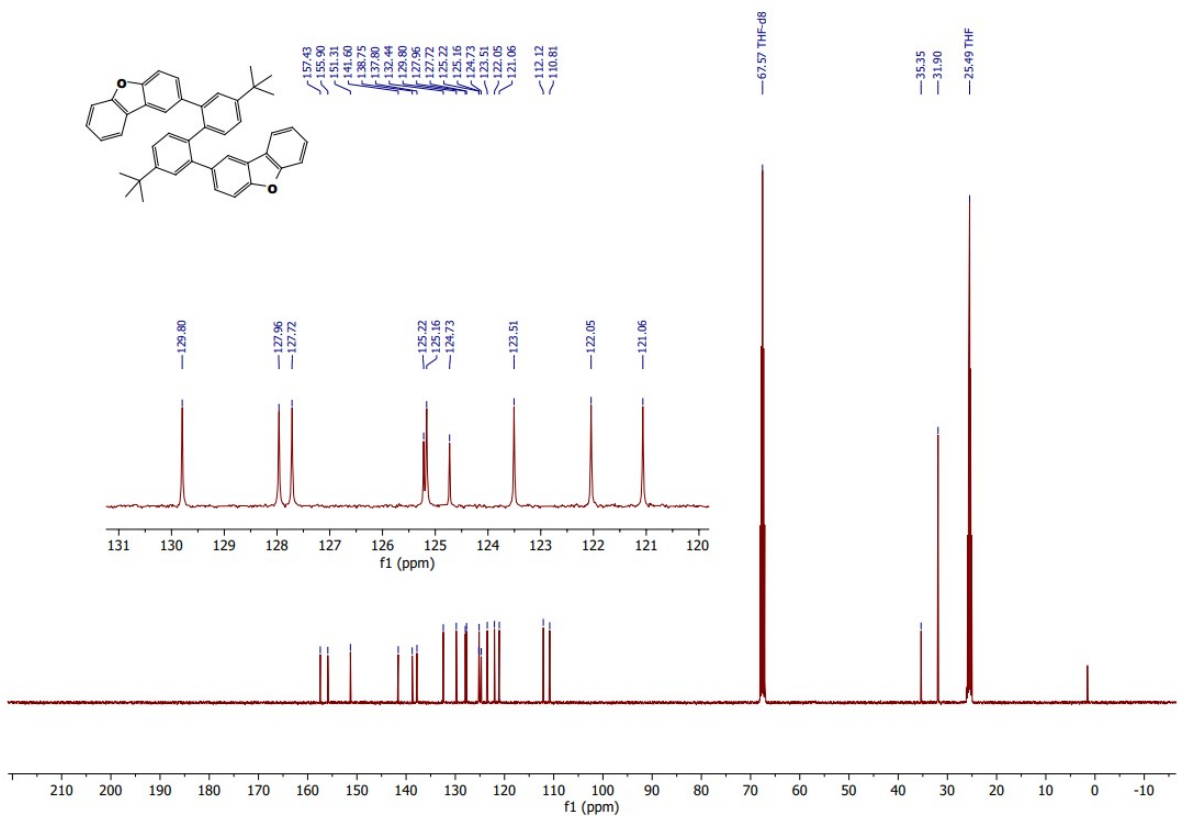

Fig. S18. <sup>13</sup>C NMR spectra of 2,2'-(4,4'-di-*tert*-butyl-[1,1'-biphenyl]-2,2'-diyl)didibenzo[b,d]furan (**DBF2-BPh(tBu)**)

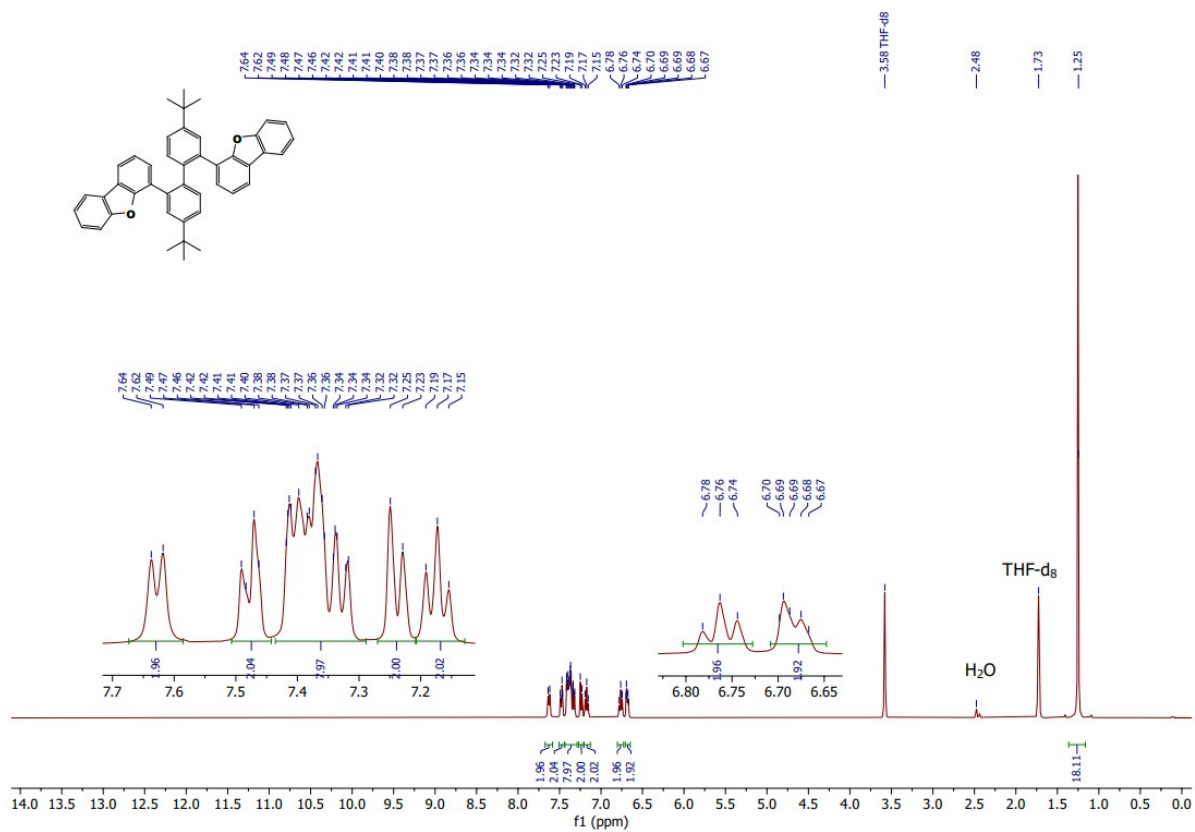

Fig. S19. <sup>1</sup>H NMR spectra of 4,4'-(4,4'-di-*tert*-butyl-[1,1'-biphenyl]-2,2'-diyl)didibenzo[b,d]furan (**DBF4-BPh(tBu)**)

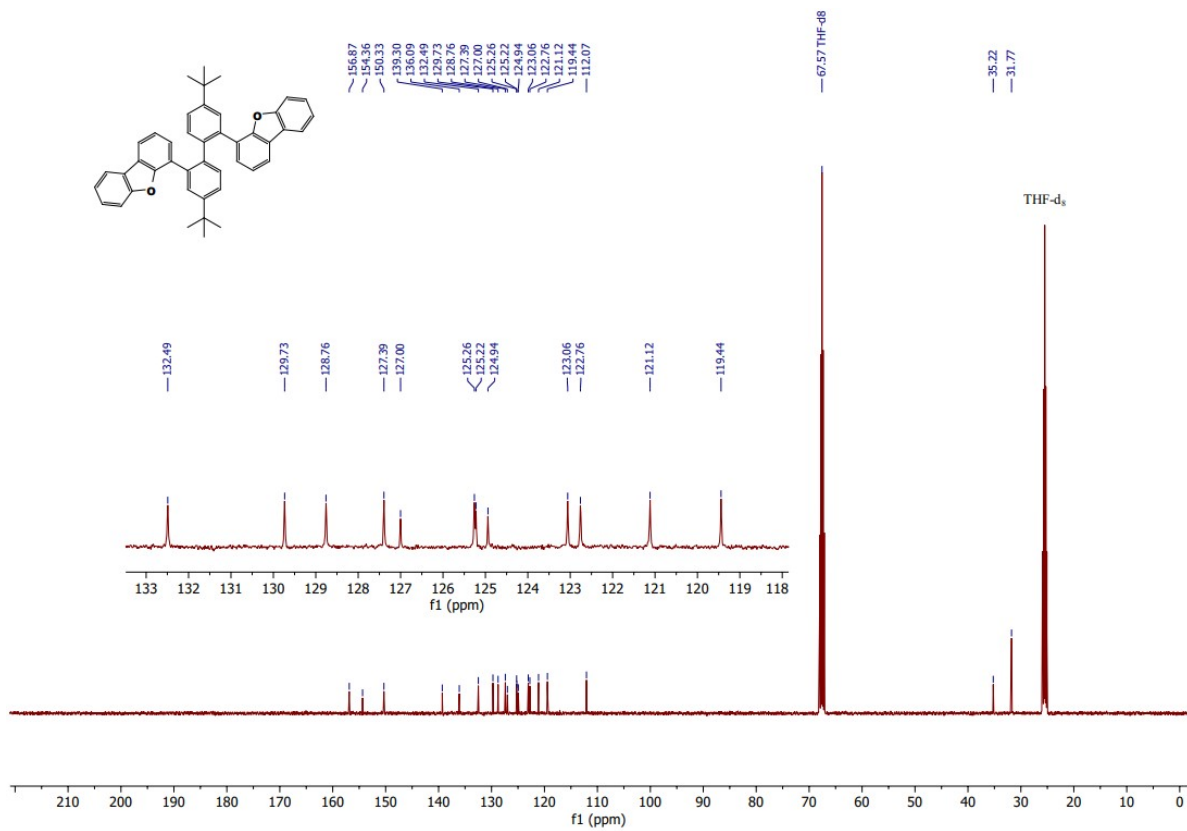

Fig. S20. <sup>13</sup>C NMR spectra of 4,4'-(4,4'-di-*tert*-butyl-[1,1'-biphenyl]-2,2'-diyl)didibenzo[b,d]furan (**DBF4-BPh(tBu)**)

## References

- 1 A. Köhler and H. Bässler, *Electronic Processes in Organic Semiconductors: An Introduction*, Wiley-VCH Verlag GmbH & Co. KGaA, Weinheim, Germany, 2015.
- 2 S.-B. Ko, S. Kang and T. Kim, *Chem. Eur. J.*, 2020, **26**, 7767–7773.
- 3 D. H. Ahn, J. H. Maeng, H. Lee, H. Yoo, R. Lampande, J. Y. Lee and J. H. Kwon, *Adv. Optical Mater.*, 2020, **8**, 2000102.
- 4 Z. Wang, M. Li, L. Gan, X. Cai, B. Li, D. Chen and S.-J. Su, *Adv. Sci.*, 2019, **6**, 1802246.
- 5 C. Y. Yang, S. Kang, H. Jeong, H. J. Jang, Y. Lee and J. Y. Lee, *J. Mater. Chem. C*, 2020, **8**, 1697–1703.
- 6 T. H. Ha, S. W. Kang and C. W. Lee, *Org. Electron.*, 2024, **124**, 106960.
